# Supplementary material for: The effect of climate type on timescales of drought propagation in an ensemble of global hydrological models
Source: Copernicus journal article supplement (doi:10.5194/hess-22-4649-2018), 2018-09-06
Supplement: Supplementary file 1 [file hess-22-4649-2018-supplement.pdf]

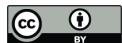

## *Supplement of*

# **The effect of climate type on timescales of drought propagation in an ensemble of global hydrological models**

**Anouk I. Gevaert et al.**

*Correspondence to:* Ted I. E. Veldkamp ([ted.veldkamp@vu.nl](mailto:ted.veldkamp@vu.nl))

The copyright of individual parts of the supplement might differ from the CC BY 4.0 License.

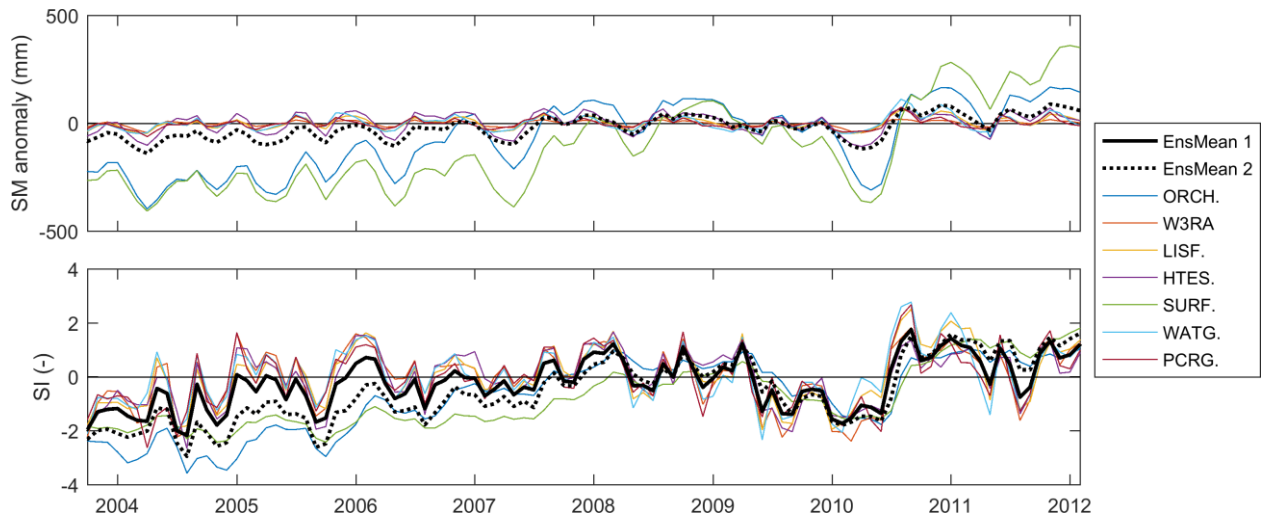

**Figure S1.** Time series of soil moisture content relative to the multi-year mean (top) and SSMI (bottom) for each of the individual models and two methods of calculating the ensemble mean. EnsMean 1 is based on averaging model SI time series, EnsMean 2 is based on averaging the original model time series.

5

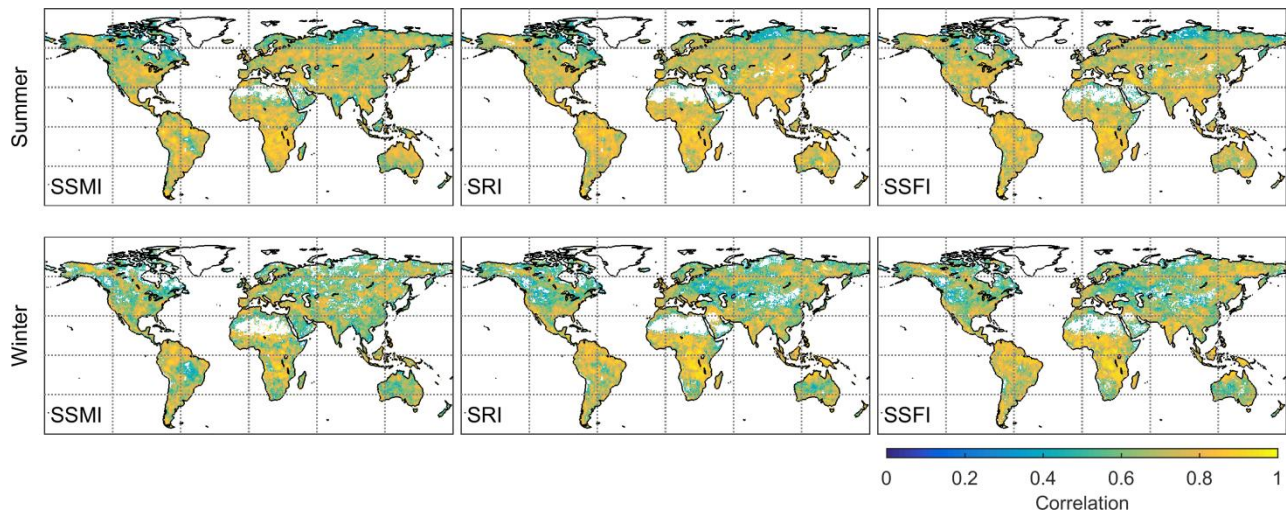

**Figure S2:** Maps of the highest correlations between SPI and model ensemble mean SSMI, SRI, and SSFI, for summer and winter droughts. Pixels where those correlations are not statistically significant ( $p < 0.05$ ) are masked.

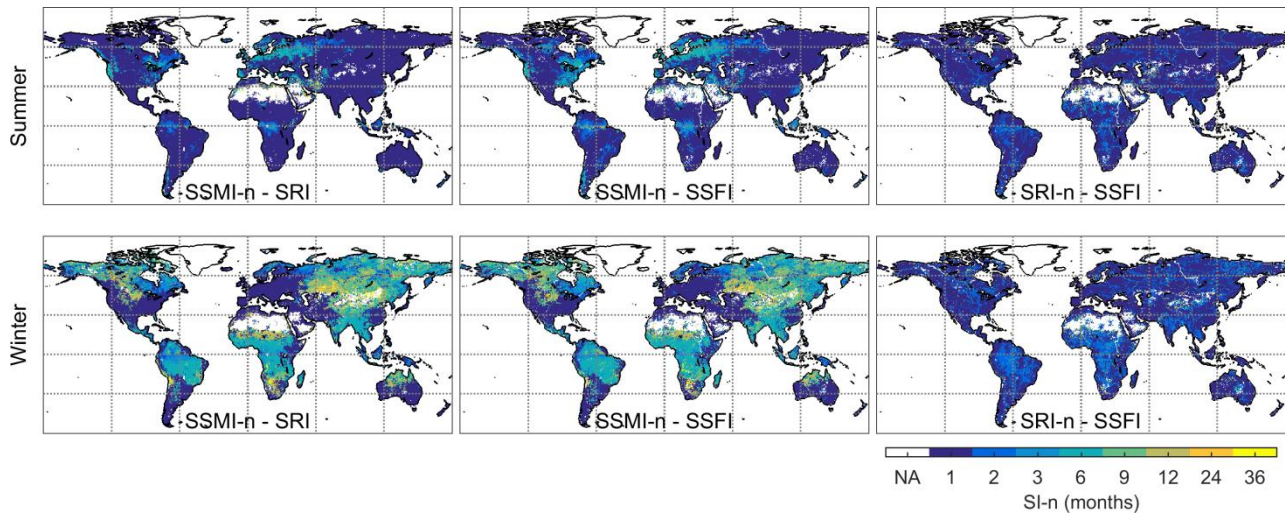

**Figure S3:** The SSMI and SRI accumulation period (SSMI-n or SRI-n) resulting in the highest correlations with model ensemble mean SRI and SSFI, for summer and winter droughts. Pixels where those correlations are not statistically significant ( $p < 0.05$ ) are masked.

5

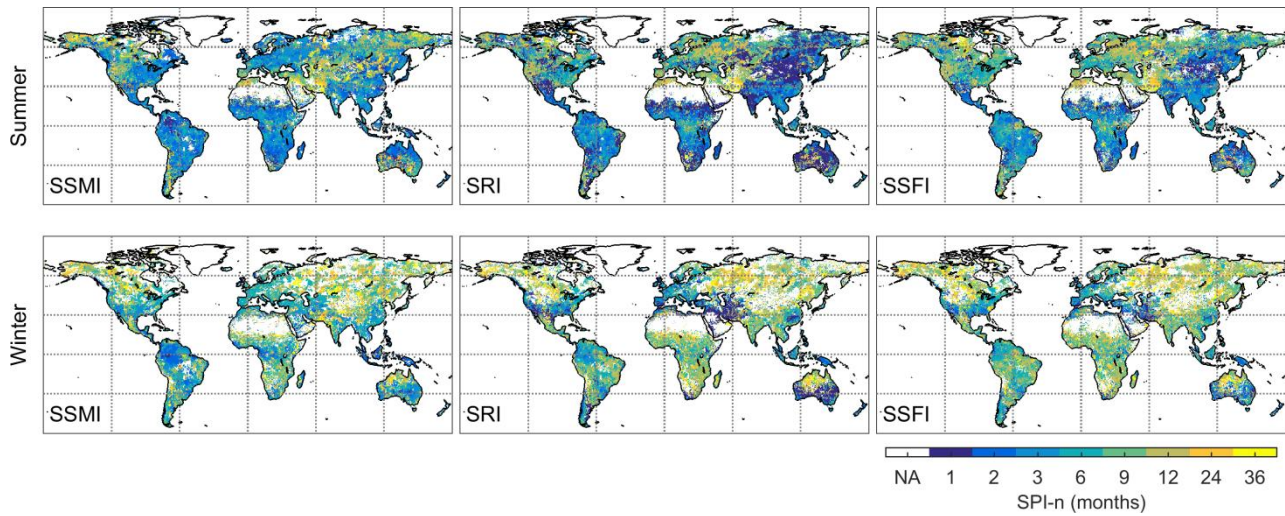

**Figure S4:** The SPI accumulation period (SPI-n) resulting in the highest correlations with model ensemble mean SSMI, SRI, and SSFI, for summer and winter droughts. Droughts in SSMI, SRI, and SSFI were identified by  $SI \leq -0.5$ . Pixels where those correlations are not statistically significant ( $p < 0.05$ ) are masked.

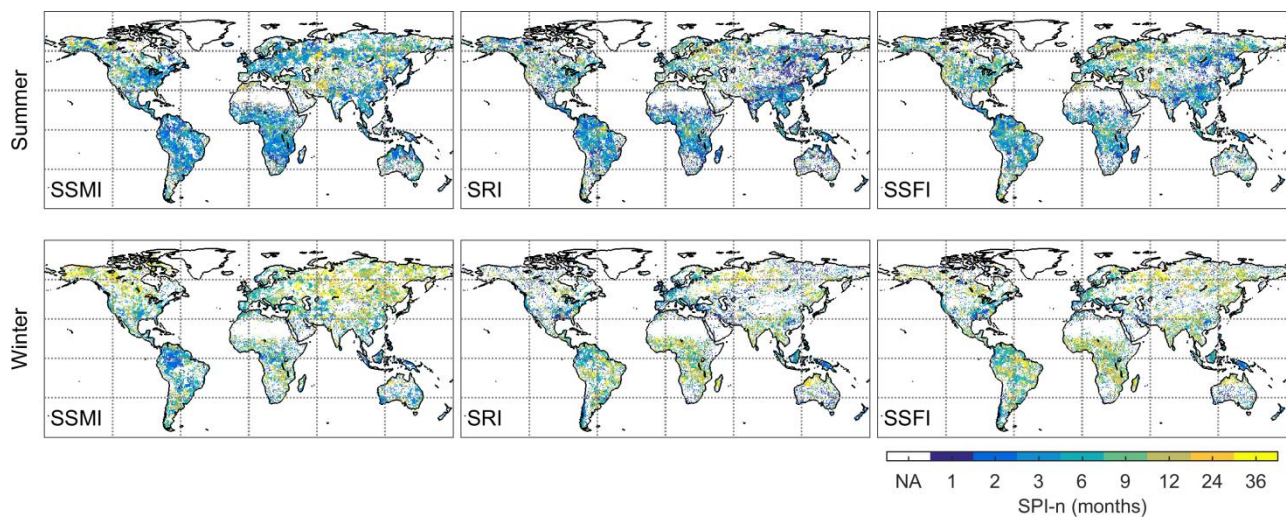

**Figure S5: The SPI accumulation period (SPI-n) resulting in the highest correlations with model ensemble mean SSMI, SRI, and SSFI, for summer and winter droughts. Droughts in SSMI, SRI, and SSFI were identified by  $SI \leq -1$ . Pixels where those correlations are not statistically significant ( $p < 0.05$ ) are masked.**

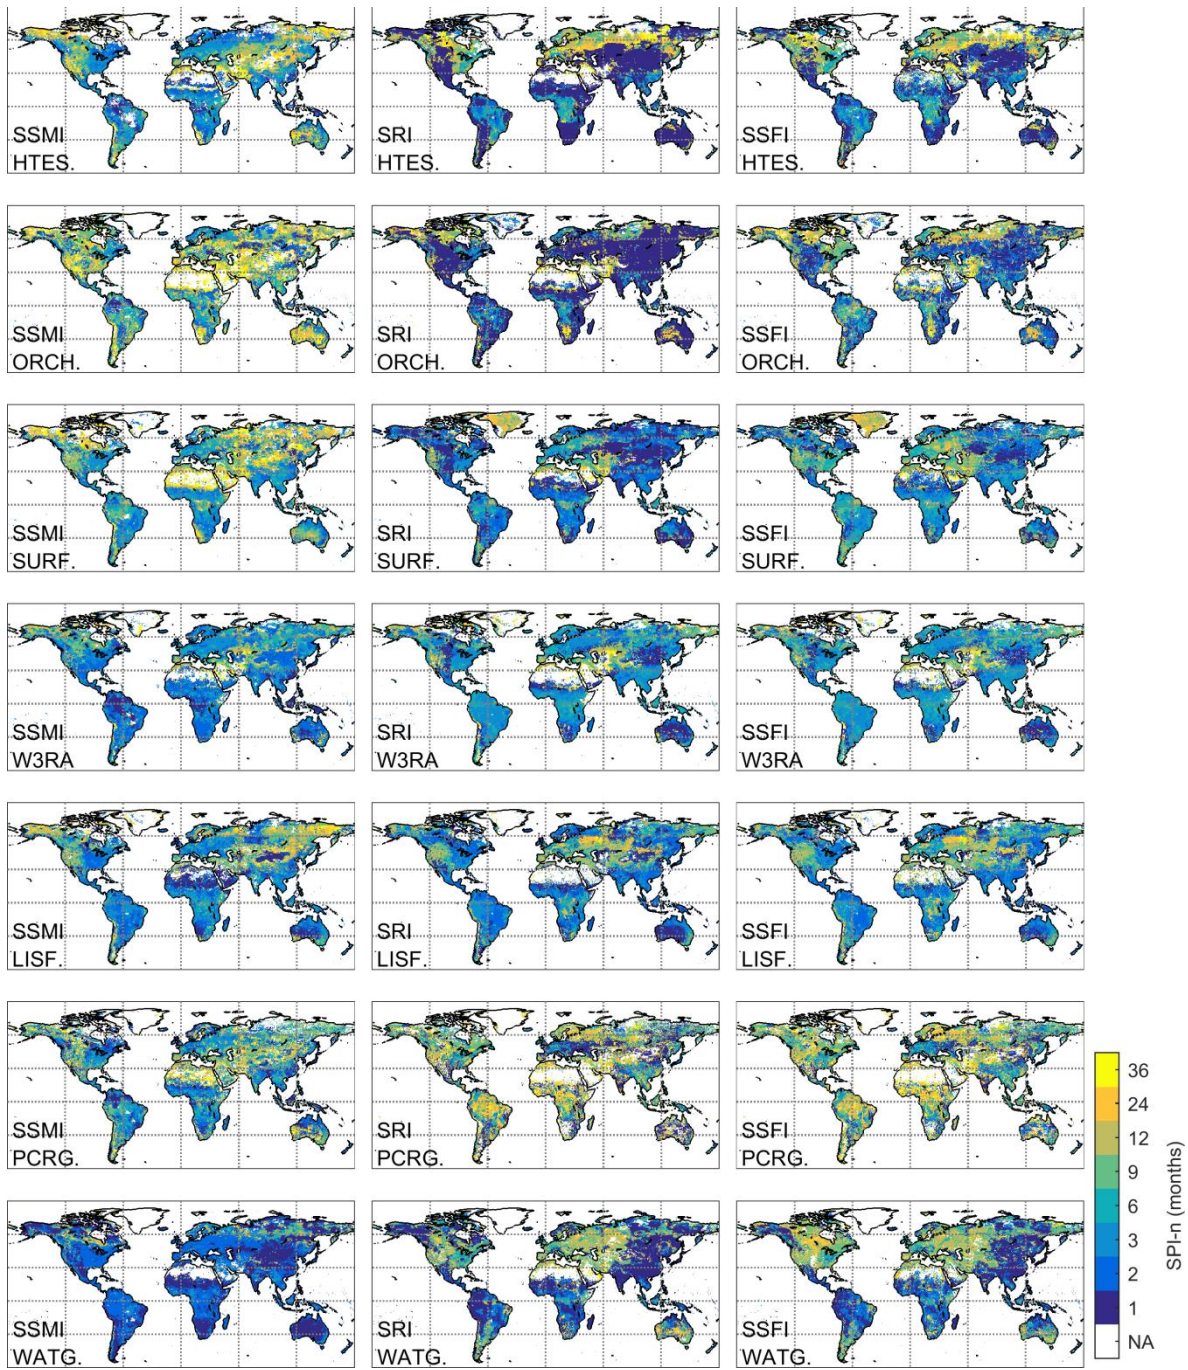

**Figure S6: The SPI accumulation period (SPI-n) resulting in the highest correlations with summer droughts in SSMI, SRI, and SSFI for each model. Pixels where those correlations are not statistically significant ( $p < 0.05$ ) are masked.**

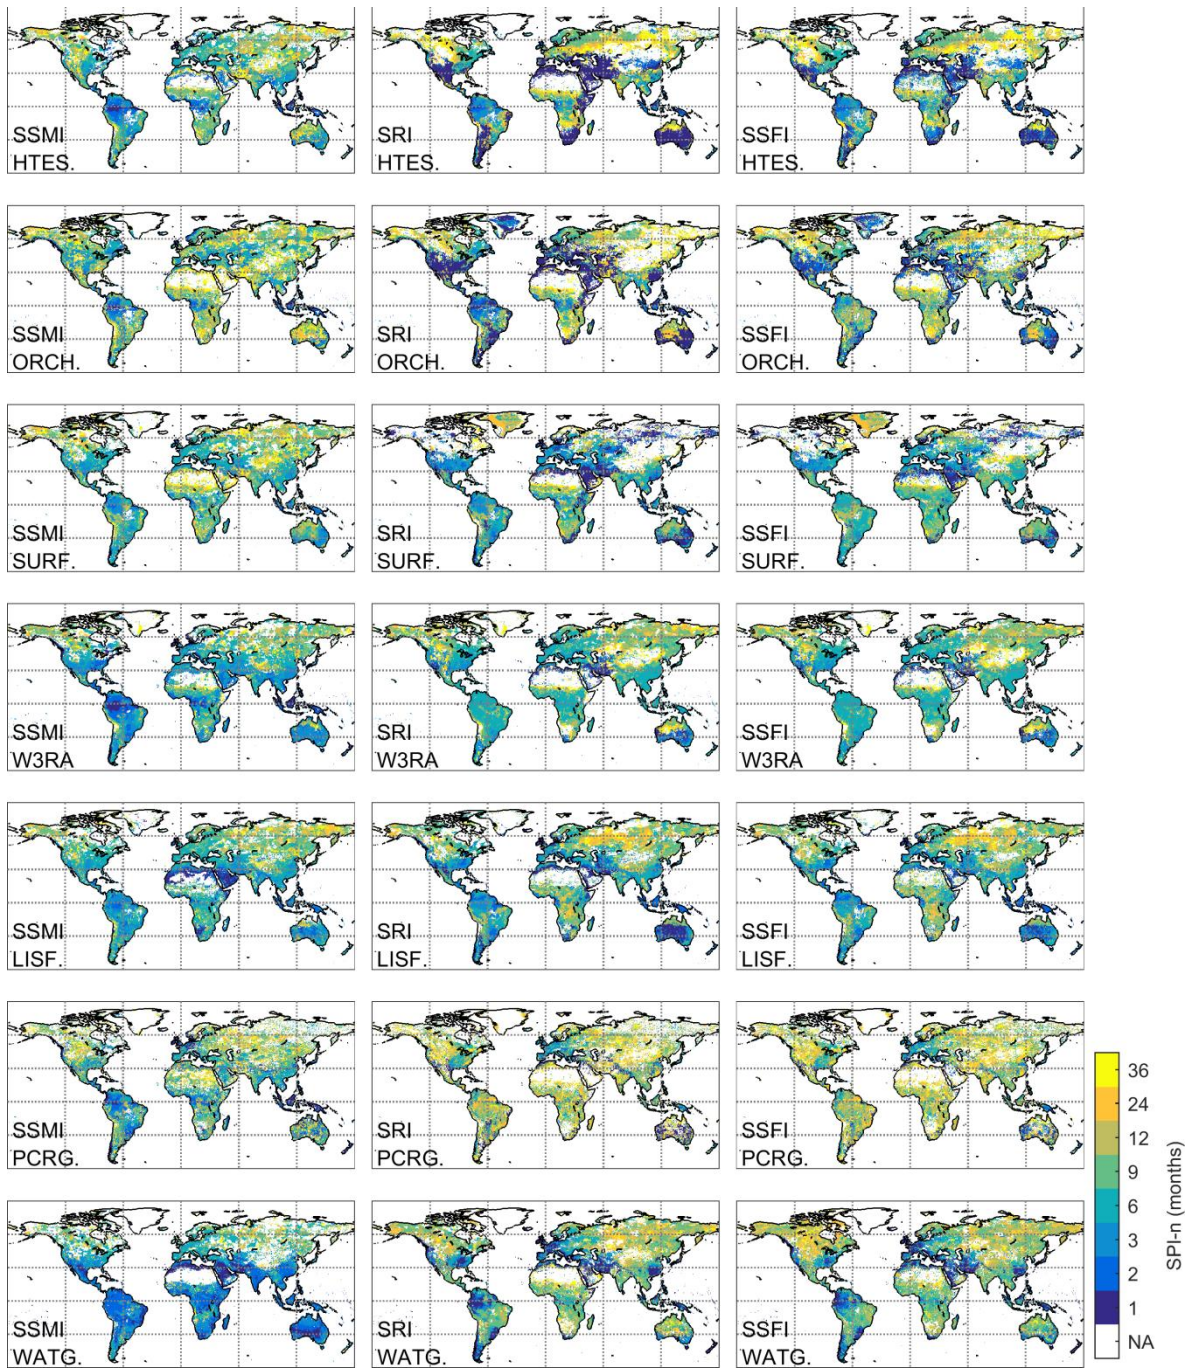

**Figure S7: The SPI accumulation period (SPI-n) resulting in the highest correlations with winter droughts in SSMI, SRI, and SSFI for each model. Pixels where those correlations are not statistically significant ( $p < 0.05$ ) are masked.**
